# Supplementary material
Source: PubMed Central journal article supplement (PMC7948282)

## Supplement

### Supplemental methods:

**Venetoclax treatment protocol:** Patients were treated following a standardized protocol, which was developed in collaboration between the Leukemia Service and the Pharmacy Service at MSKCC (see below). This protocol follows the practice guidelines as published by Brian Jonas and Daniel Pollyea (Jonas et al Leukemia 2019; doi: 10.1038/s41375-019-0612-8). Patients treated with venetoclax in combination with azacitidine (aza/ven) or decitabine (dec/ven) received 400 mg of venetoclax daily whereas patients treated with venetoclax in combination with LDAC (LDAC/ven) received 600 mg of venetoclax daily. If the absolute neutrophil count (ANC) of patients fell below 0.5 at any time during treatment, patients were started on antifungal prophylaxis with a strong CYP34 inhibitor such as voriconazole or posaconazole and the venetoclax dose was reduced to 100 mg daily for aza/ven or dec/ven and to 150 mg for LDAC/ven.

#### Examples of interacting medications\*

**Strong** CYP3A4 inhibitors: Posaconazole, Voriconazole, Ritonavir

**Moderate** CYP3A4 inhibitors: Isavuconazole, Fluconazole, Diltiazem, Verapamil

**P-gp** inhibitors: Cyclosporine, Tacrolimus, Ritonavir, Verapamil, Carvedilol

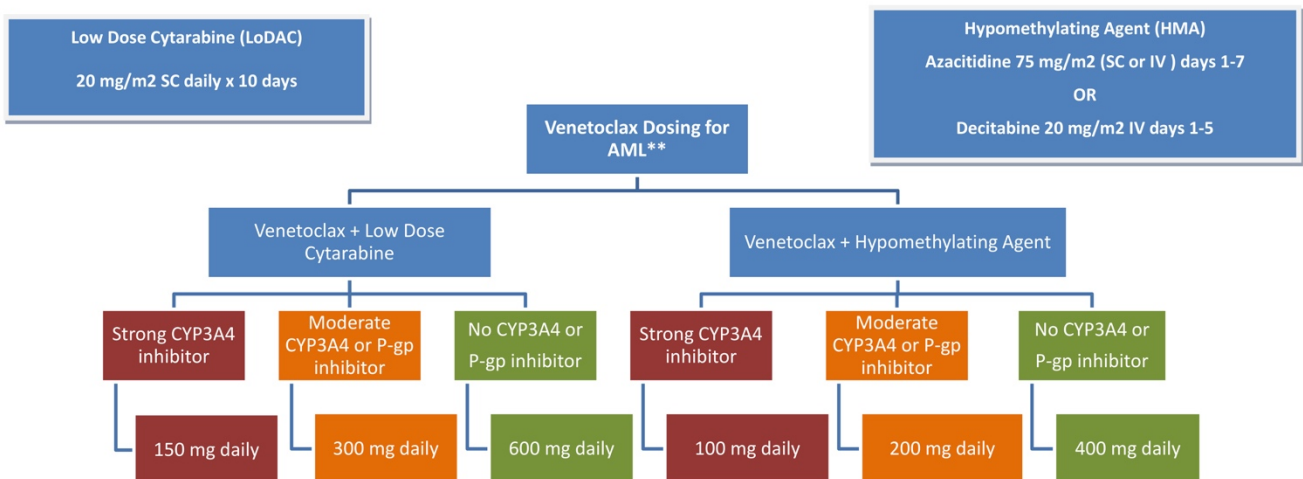

\*\*Current FDA Approval is for untreated AML patients  $\geq 75$  y.o or with comorbidities that deem them ineligible for intensive treatment

#### Prolonged neutropenia/thrombocytopenia:

Strongly consider bone marrow biopsy after C1D28 to assess disease response versus drug-toxicity

If favorable response observed, consider venetoclax dose reduction to 50 mg - 70 mg (patients on strong CYP3A4 inhibitors) for subsequent cycles, or (independent of drug-drug interactions) reduce duration of venetoclax for subsequent cycles by 7 - 14 days (e.g. 21 days or 14 days of a 28 day cycle)

Though adjustment of venetoclax to 50 mg when used with LDAC and a strong CYP3A4 inhibitor is described in the VIALE-C trial (Wei et al Blood 2020; doi: 10.1182/blood.2020004856), current manufacturer recommendations are an adjustment to 100 mg daily with concomitant strong CYP3A4 inhibitors. A 75% dose reduction from the venetoclax target (e.g. 150 mg for 600 mg target and 100 mg for a 400 mg target) is kinetically reasonable with strong CYP3A4 inhibitors (venetoclax prescribing information; <https://www.rxabbvie.com/pdf/venclaxta.pdf>). Our rationale is supported by pharmacokinetic data from Agarwal and colleagues, their findings noted that posaconazole (a strong CYP3A4 inhibitor) can be used safely after reducing the venetoclax dose by at least 75% (Agarwal et al Clin Ther. 2017; doi: 10.1016/j.clinthera.2017.01.003). Furthermore, the initial safety/efficacy report of 145 patients in the landmark phase 1b trial studied venetoclax doses as high as 1200 mg (DiNardo et al Blood 2019; doi: 10.1182/blood-2018-08-868752). The 1200 mg cohort experienced a *trend* toward higher frequency of hematologic and gastrointestinal adverse events, while the 400 mg and 800 mg were noted to be similarly tolerated. Our adjustment strategy would lend to exposure under 800 mg, additionally the authors do not believe that venetoclax exposure of 800 mg would cause excess toxicity.

**Analysis of cytogenetic and molecular data at time of diagnosis and time of relapse:** Cytogenetic data were taken from clinical reports produced by the MSK Clinical Cytogenetics Laboratory and included data from both karyotype and fluorescent in-situ hybridization (FISH). Molecular data were obtained from reports of clinical next-generation sequencing (NGS) performed using RainDance Technologies, ThunderStorm and ThunderBolts Cancer Panel, as well as Memorial Sloan Kettering Integrated Mutation Profiling of Actionable Cancer Targets (MSK-IMPACT). The test characteristics of MSK-IMPACT have previously been described in *Nature Medicine* (Zehir et al, Nature 2017; doi: 10.1038/nm.4333). In the *Nature Medicine* paper on the assay, it was shown to have much greater sensitivity when compared to two commercially-available amplicon assays. The IMPACT assay sequences to a mean read depth of greater than 700x and in our analysis of clinical data, molecular features present at a VAF of 0.05 or greater were considered to be present in a given sample. For patients sequenced using a platform that did not contain all of the genes of interest, the missing genes were considered non-informative instead of non-mutated. NGS and cytogenetic evaluations were performed on bone marrow aspirates (BMA) or peripheral blood; if both were available, data from BMA were used preferentially. A variant allele frequency of 0.5% was used as a cutoff for consideration of variant calls, which were annotated using MSKCC's clinical pipeline. The data was reviewed by both the clinical bioinformatics and pathology teams prior to the mutational calls being confirmed. For the relapse analysis, only patients who had had IMPACT testing performed both prior to treatment initiation and at the time of relapse were included.

**Immunophenotypic analysis by flow cytometry:** In brief, up to 1.5 million cells from freshly drawn bone marrow aspirate were stained with 3 to 6 ten-color panels, washed, and acquired on a Canto-10 cytometer (BD Biosciences, San Jose, CA). The results were analyzed using custom Woodlist software (generous gift of B. L. Wood, University of Washington) and interpreted by AC and MR. Immunophenotypic characteristics of responding patients (Resp) were compared with non-responding patients (NonResp). Additionally, immunophenotypic characteristics at time of treatment start (Dx) were compared with immunophenotypic characteristics at time of relapse (RL). Immunophenotypic characteristics included monocytes, immature monocytes, blasts and CD38 dim blasts. Monocytes were identified by moderate side scatter, variable expression of CD14, CD45 and HLA-DR, and relatively bright expression of CD64. Immature monocytes were identified as a monocyte population with dim CD11b, dim CD14, and bright HLA-DR. Blasts were identified by CD34 or CD117 expression. CD38 dim blasts were identified as a blast population expressing dim CD38.

**Statistical analysis:** Categorical patient characteristics were summarized by frequency. Univariate logistic regression models were used to estimate the odds ratios (ORs) with 95% confidence intervals (CIs), for associations between overall response and patient and disease characteristics. Univariate Cox proportional hazards models were used to estimate Hazard ratios (HRs) with 95% CIs, for association between mortality and patient and disease characteristics. P-values for the significance of these associations were calculated by a Wald-test. Associations between molecular predictors and overall response were tested by Fisher's exact test and odds ratios with 95% CIs were estimated by fitting logistic regression. Associations between mortality and molecular predictors were assessed by log-rank test and HRs with 95% CIs were estimated using univariate Cox proportional hazards models. Survival plots and estimates of median survivals with 95% CIs were generated for the main findings using the Kaplan-Meier method, and statistical significance was assessed by log-rank test. Lastly, for each group of patients, the associations with survival of clinical and molecular predictors that had a significant association with ORR or survival in our univariate analysis were jointly evaluated by using multivariable Cox proportional hazards model. Statistical significance was defined using a two-sided significance level at 0.05. All statistical analyses were using R version 3.6.1.

## Supplemental Tables

**Supplemental Table 1: Frequency of mutations**

| <b>Mutation</b> | <b>N (%)</b> |
|-----------------|--------------|
| DNMT3A          | 27 (33%)     |
| SRSF2           | 16 (22%)     |
| RUNX1           | 16 (20%)     |
| IDH2            | 15 (18%)     |
| NPM1            | 13 (16%)     |
| TET2            | 13 (16%)     |
| STAG2           | 10 (14%)     |
| TP53            | 11 (13%)     |
| IDH1            | 9 (11%)      |
| SF3B1           | 9 (11%)      |
| CEBPA           | 8 (10%)      |
| NRAS            | 10 (12%)     |
| FLT3            | 9 (11%)      |
| GATA2           | 7 (9%)       |
| ASXL1           | 6 (7%)       |
| BCOR            | 5 (7%)       |
| PTPN11          | 6 (8%)       |
| BCORL1          | 4 (5%)       |
| CSF3R           | 4 (5%)       |
| EZH2            | 4 (5%)       |
| JAK2            | 4 (5%)       |
| KRAS            | 4 (5%)       |
| ETV6            | 3 (4%)       |
| PHF6            | 3 (4%)       |
| RAD21           | 3 (4%)       |
| SETBP1          | 3 (4%)       |
| U2AF1           | 3 (4%)       |
| WT1             | 3 (4%)       |

**Supplemental Table 2: Univariable analysis of clinical predictors for response and survival for RR-AML patients treated with venetoclax combination therapy**

| Variable                                                                                                  | Response (CR/CRi/MLFS)   |                         | Death                   |                  |
|-----------------------------------------------------------------------------------------------------------|--------------------------|-------------------------|-------------------------|------------------|
|                                                                                                           | OR (95%CI)               | P-value                 | HR (95%CI)              | P-value          |
| Age (ref: < 65 years)                                                                                     |                          |                         |                         |                  |
| > 75 years                                                                                                | 1.56 (0.45,5.35)         | 0.20                    | 0.81 (0.4,1.66)         | 0.57             |
| 65-75 years                                                                                               | 1.96 (0.69,5.57)         | 0.48                    | 0.84 (0.46,1.54)        | 0.57             |
| AML type (ref: de novo)                                                                                   |                          |                         |                         |                  |
| Secondary                                                                                                 | 0.53 (0.21,1.35)         | 0.18                    | 1.18 (0.69,2.01)        | 0.55             |
| Prior HMA therapy (ref: no)                                                                               |                          |                         |                         |                  |
| Yes                                                                                                       | 0.59 (0.24,1.49)         | 0.26                    | 1.54 (0.88,2.7)         | 0.13             |
| Cycles of prior HMA therapy (ref: naïve)                                                                  |                          |                         |                         |                  |
| 1-4 cycles                                                                                                | 0.62 (0.2,1.95)          | 0.41                    | 1.86 (0.97,3.57)        | 0.06             |
| >4 cycles                                                                                                 | 0.64 (0.21,1.91)         | 0.42                    | 1.29 (0.66,2.51)        | 0.45             |
| Prior alloSCT (ref: no)                                                                                   | 0.76 (0.22,2.64)         | 0.66                    | <b>2.0 (1.06,3.96)</b>  | <b>0.03</b>      |
| Number of prior lines of salvage therapy excluding induction/re-induction/consolidation therapy (ref: <3) |                          |                         |                         |                  |
| ≥ 3                                                                                                       | <b>0 (0,Inf)</b>         | <b>0.04<sup>1</sup></b> | <b>3.12 (1.45,6.7)</b>  | <b>0.004</b>     |
| Venetoclax combination (ref: LDAC/ven)                                                                    |                          |                         |                         |                  |
| Aza/ven                                                                                                   | <b>5.43 (1.55,19.00)</b> | <b>0.008</b>            | <b>0.36 (0.19,0.7)</b>  | <b>0.003</b>     |
| Dec/ven                                                                                                   | 1.92 (0.44,8.31)         | 0.38                    | 0.59 (0.3,1.17)         | 0.13             |
| Best response with combination venetoclax therapy (time dependent)                                        |                          |                         |                         |                  |
| CR/CRi/MLFS achieved (ref: not achieved)                                                                  | ---                      |                         | <b>0.1 (0.04,0.3)</b>   | <b>&lt;0.001</b> |
| CR/CRi MRD- achieved (ref: not achieved)                                                                  | ---                      |                         | <b>0.09 (0.01,0.69)</b> | <b>0.02</b>      |
| alloSCT received (ref: not received)                                                                      | ---                      |                         | <b>0.17 (0.04,0.74)</b> | <b>0.02</b>      |

P < 0.05 marked bold

<sup>1</sup> P-value from score test.

**Supplemental Table 3: Univariable analysis of molecular predictors for response and survival for RR-AML patients treated with venetoclax combination therapy**

| Variable                    | Overall response (CR/CRi/MLFS) |             | Complete remission (CR/CRi) |              | Death                    |              |
|-----------------------------|--------------------------------|-------------|-----------------------------|--------------|--------------------------|--------------|
|                             | OR (95%CI)                     | P value     | OR (95%CI)                  | P value      | HR (95%CI)               | P value      |
| DNMT3A                      | 2.34 (0.89,6.19)               | 0.13        | 2.65 (0.94;7.48)            | 0.1          | 0.74 (0.4,1.36)          | 0.33         |
| SRSF2                       | 1.88 (0.6,5.85)                | 0.37        | 2.3 (0.7;7.6)               | 0.2          | 0.62 (0.29,1.34)         | 0.22         |
| RUNX1                       | 0.43 (0.11,1.67)               | 0.25        | 0.67 (0.17;2.62)            | 0.75         | 1.19 (0.62,2.28)         | 0.6          |
| IDH2                        | 1.57 (0.49,4.99)               | 0.54        | 2.52 (0.77;8.29)            | 0.18         | 0.79 (0.37,1.69)         | 0.54         |
| NPM1                        | <b>4.53 (1.31,15.66)</b>       | <b>0.02</b> | 3.37 (0.98;11.62)           | 0.07         | 0.68 (0.29,1.59)         | 0.37         |
| TET2                        | 1.43 (0.42,4.88)               | 0.75        | 0.92 (0.23;3.73)            | 0.92         | 0.97 (0.47,1.99)         | 0.93         |
| STAG2                       | 2.37 (0.61,9.14)               | 0.28        | 2.38 (0.59;9.63)            | 0.24         | <b>0.32 (0.1,1.02)</b>   | <b>0.04</b>  |
| TP53                        | 0.18 (0.02,1.52)               | 0.16        | 0 (0;Inf)                   | 0.06         | <b>2.24 (1.07,4.69)</b>  | <b>0.03</b>  |
| IDH1                        | <b>5.3 (1.21,23.24)</b>        | <b>0.03</b> | <b>4.83 (1.15;20.24)</b>    | <b>0.04</b>  | 0.31 (0.07,1.26)         | 0.08         |
| SF3B1*                      | 0 (0,Inf)                      | 0.05        | 0 (0;Inf)                   | 0.1          | <b>2.5 (1.1,5.65)</b>    | <b>0.02</b>  |
| CEBPA                       | 2.36 (0.54,10.31)              | 0.26        | 2.01 (0.44;9.29)            | 0.40         | 0.52 (0.19,1.44)         | 0.2          |
| NRAS+KRAS                   | 0.6 (0.15,2.39)                | 0.54        | 0.52 (0.1;2.55)             | 0.50         | <b>2.1 (1.04,4.22)</b>   | <b>0.03</b>  |
| FLT3                        | 1.85 (0.45,7.57)               | 0.45        | 1.65 (0.37;7.3)             | 0.68         | 1.01 (0.4,2.55)          | 0.99         |
| GATA2                       | 1.64 (0.34,8)                  | 0.68        | 1.27 (0.23;7.22)            | 1            | 0.68 (0.24,1.91)         | 0.47         |
| ASXL1                       | 0.41 (0.05,3.68)               | 0.66        | 0.6 (0.07;5.46)             | 1            | 1.35 (0.53,3.41)         | 0.53         |
| BCOR                        | 1.42 (0.22,9.14)               | 0.66        | 0.76 (0.08;7.32)            | 1            | 1.33 (0.52,3.4)          | 0.55         |
| PTPN11*                     | 0 (0,Inf)                      | 0.17        | 0 (0;Inf)                   | 0.33         | 1.55 (0.61,3.97)         | 0.35         |
| BCORL1*                     | 0 (0,Inf)                      | 0.3         | 0 (0,Inf)                   | 0.56         | 1.36 (0.42,4.42)         | 0.61         |
| CSF3R*                      | 0 (0,Inf)                      | 0.3         | 0 (0,Inf)                   | 0.56         | 2.38 (0.73,7.82)         | 0.14         |
| EZH2*                       | 0 (0,Inf)                      | 0.3         | 0 (0,Inf)                   | 0.56         | <b>4.13 (1.43,11.96)</b> | <b>0.004</b> |
| JAK2*                       | 0 (0,Inf)                      | 0.3         | 0 (0,Inf)                   | 0.56         | 1.74 (0.54,5.64)         | 0.35         |
| ETV6                        | 1.08 (0.09,12.48)              | 1           | 1.08 (0.09,12.48)           | 1            | 0.31 (0.04,2.22)         | 0.21         |
| PHF6                        | 1.08 (0.09,12.48)              | 1           | 1.08 (0.09,12.48)           | 1            | 0.52 (0.07,3.81)         | 0.52         |
| U2AF1                       | 1.04 (0.09,12.11)              | 1           | 1.04 (0.09,12.11)           | 1            | 0.51 (0.07,3.74)         | 0.5          |
| Adverse cytogenetics        | <b>0.32 (0.11,0.9)</b>         | <b>0.03</b> | <b>0.2 (0.05;0.76)</b>      | <b>0.02</b>  | <b>1.95 (1.13,3.35)</b>  | <b>0.01</b>  |
| Complex/monosomal karyotype | 0.31 (0.1,1.03)                | 0.05        | <b>0.1 (0.01;0.76)</b>      | <b>0.009</b> | <b>1.98 (1.13,3.5)</b>   | <b>0.02</b>  |
| del17                       | 0.72 (0.07,7.24)               | 0.78        | 0 (0;Inf)                   | 0.57         | 1.47 (0.46,4.76)         | 0.51         |
| TP53+del17                  | 0.16 (0.02,1.34)               | 0.09        | <b>0 (0;Inf)</b>            | <b>0.03</b>  | <b>2.42 (1.19,4.95)</b>  | <b>0.01</b>  |

P< 0.05 marked bold

\* mutations are present only in responding or non-responding patients

\*\* mutations are present only in surviving or non-surviving patients

### Supplemental Table 4: Co-occurrence of gene mutations

Each pair of gene mutations was tested for the presence of dependency using Fisher's exact test. Pair of genes with p-value < 0.05 (indicated in orange/red) are determined to have significant dependency in occurrence (i.e. co-occurrence or mutual-exclusivity). Pair of genes with p-value >= 0.05 (indicated in yellow) are determined to have no significant dependency in occurrence.

|        | DNMT3A | RUNX1 | SRSF2 | IDH2 | NPM1 | TET2 | TP53 | NRAS | STAG2 | FLT3 | IDH1 | SF3B1 | CERPA | GATA2 | ASXL1 | PTPW11 | BCOR | BCORL1 | CSF3R | EZH2 | IAK2 | KRAS |
|--------|--------|-------|-------|------|------|------|------|------|-------|------|------|-------|-------|-------|-------|--------|------|--------|-------|------|------|------|
| DNMT3A | NA     | 0.14  | 0.04  | 0.23 | 0.02 | 0.53 | 0.09 | 1    | 0.09  | 0    | 0    | 0.71  | 1     | 0.69  | 0.17  | 1      | 0.65 | 1      | 0.29  | 0.6  | 1    | 1    |
| RUNX1  | 0.14   | NA    | 0.01  | 0.16 | 0.06 | 1    | 0.68 | 1    | 0.41  | 0.37 | 0.68 | 0.37  | 0.18  | 0.62  | 0.01  | 0.59   | 0.05 | 1      | 1     | 0.17 | 0.17 | 1    |
| SRSF2  | 0.04   | 0.01  | NA    | 0.01 | 0.44 | 0.03 | 0.44 | 1    | 0     | 0.19 | 0.67 | 0.19  | 0.04  | 0.64  | 0.02  | 0.33   | 1    | 0.57   | 0.2   | 0.57 | 0.57 | 0.2  |
| IDH2   | 0.23   | 0.16  | 0.01  | NA   | 1    | 0.11 | 0.68 | 0.38 | 0.02  | 0.67 | 0.35 | 0.2   | 0.16  | 0.61  | 0.3   | 0.59   | 0.58 | 1      | 0.58  | 0.56 | 1    | 0.15 |
| NPM1   | 0.02   | 0.06  | 0.44  | 1    | NA   | 0.68 | 0.2  | 0.19 | 0.2   | 0.03 | 0.15 | 1     | 0.02  | 0.32  | 0.58  | 0.58   | 1    | 0.52   | 1     | 1    | 0.12 | 1    |
| TET2   | 0.53   | 1     | 0.03  | 0.11 | 0.68 | NA   | 1    | 0.35 | 0.37  | 0.34 | 0.34 | 0.34  | 0.11  | 0.6   | 0.24  | 1      | 0.04 | 1      | 1     | 1    | 0.51 | 1    |
| TP53   | 0.09   | 0.68  | 0.44  | 0.68 | 0.2  | 1    | NA   | 0.34 | 1     | 0.6  | 0.6  | 1     | 0.58  | 1     | 0.22  | 0.56   | 0.48 | 1      | 0.44  | 0.44 | 1    | 1    |
| NRAS   | 1      | 1     | 1     | 0.38 | 0.19 | 0.35 | 0.34 | NA   | 0.59  | 1    | 0.3  | 1     | 1     | 0.57  | 1     | 1      | 0.37 | 1      | 0.41  | 0.41 | 0.41 | 0.41 |
| STAG2  | 0.09   | 0.41  | 0     | 0.02 | 0.2  | 0.37 | 1    | 0.59 | NA    | 1    | 0.6  | 0.59  | 0.05  | 0.24  | 0.18  | 0.59   | 1    | 1      | 0.45  | 1    | 1    | 0.45 |
| FLT3   | 0      | 0.37  | 0.19  | 0.67 | 0.03 | 0.34 | 0.6  | 1    | 1     | NA   | 0.26 | 0.26  | 0.59  | 1     | 0.51  | 0.55   | 1    | 1      | 1     | 0.38 | 1    | 1    |
| IDH1   | 0      | 0.68  | 0.67  | 0.35 | 0.15 | 0.34 | 0.6  | 0.3  | 0.6   | 0.26 | NA   | 0.59  | 0.59  | 1     | 1     | 1      | 1    | 1      | 0.41  | 0.38 | 0.38 | 1    |
| SF3B1  | 0.71   | 0.37  | 0.19  | 0.2  | 1    | 0.34 | 0.6  | 1    | 0.59  | 0.26 | 0.59 | NA    | 0.59  | 1     | 0.51  | 1      | 1    | 1      | 1     | 0.38 | 0.38 | 1    |
| CERPA  | 1      | 0.18  | 0.04  | 0.16 | 0.02 | 0.11 | 1    | 1    | 0.05  | 0.59 | 0.59 | 0.59  | NA    | 0.13  | 0.1   | 1      | 0.4  | 1      | 0.33  | 1    | 1    | 0.34 |
| GATA2  | 0.69   | 0.62  | 0.64  | 0.61 | 0.32 | 0.6  | 0.58 | 0.57 | 0.24  | 1    | 1    | 1     | 0.13  | NA    | 1     | 0.46   | 0.4  | 0.33   | 1     | 0.33 | 1    | 0.33 |
| ASXL1  | 0.17   | 0.01  | 0.02  | 0.3  | 0.58 | 0.24 | 1    | 1    | 0.18  | 0.51 | 1    | 0.51  | 0.1   | 1     | NA    | 0.41   | 0.35 | 1      | 0.03  | 0.27 | 1    | 1    |
| PTPW11 | 1      | 0.59  | 0.33  | 0.59 | 0.58 | 1    | 0.22 | 1    | 0.59  | 0.55 | 1    | 1     | 1     | 0.46  | 0.41  | NA     | 1    | 0.29   | 1     | 0.03 | 1    | 1    |
| BCOR   | 0.65   | 0.05  | 1     | 0.58 | 0.58 | 0.04 | 0.56 | 1    | 1     | 1    | 1    | 1     | 0.4   | 0.4   | 0.35  | 1      | NA   | 1      | 1     | 1    | 1    | 1    |
| BCORL1 | 1      | 1     | 0.57  | 1    | 1    | 1    | 0.48 | 0.37 | 1     | 1    | 1    | 1     | 1     | 0.33  | 1     | 0.29   | 1    | NA     | 1     | 0.2  | 1    | 1    |
| CSF3R  | 0.29   | 1     | 0.2   | 0.58 | 0.52 | 1    | 1    | 1    | 0.45  | 1    | 0.41 | 1     | 0.33  | 1     | 0.03  | 1      | 1    | 1      | NA    | 1    | 1    | 1    |
| EZH2   | 0.6    | 0.17  | 0.57  | 0.56 | 1    | 1    | 0.44 | 0.41 | 1     | 0.38 | 0.38 | 0.38  | 1     | 0.33  | 0.27  | 0.03   | 1    | 0.2    | 1     | NA   | 1    | 1    |
| IAK2   | 1      | 0.17  | 0.57  | 1    | 1    | 0.51 | 0.44 | 0.41 | 1     | 1    | 0.38 | 0.38  | 1     | 1     | 1     | 1      | 1    | 1      | 1     | 1    | NA   | 1    |
| KRAS   | 1      | 1     | 0.2   | 0.15 | 0.12 | 1    | 1    | 0.41 | 0.45  | 1    | 1    | 1     | 0.34  | 0.33  | 1     | 1      | 1    | 1      | 1     | 1    | 1    | 1    |

### Supplemental Table 5: Multivariable model of mutations with favorable impact on response

| Mutation | OR   | 95% CI     | P-value    |
|----------|------|------------|------------|
| IDH1     | 3.94 | 0.82-18.85 | 0.08618344 |
| NPM1     | 3.95 | 1.01-15.39 | 0.04809235 |
| STAG2    | 2.76 | 0.61-12.53 | 0.18834592 |
| IDH2     | 1.22 | 0.32-4.67  | 0.77178274 |

**Supplemental Table 6: Clinical outcomes based on 2017 ELN molecular risk status**

| Response based on 2017 ELN risk                    | favorable       | intermediate   | adverse          | P value |
|----------------------------------------------------|-----------------|----------------|------------------|---------|
| <b>Response</b>                                    |                 |                |                  |         |
| - ORR = CR/CRi/MLFS                                | 8/12 (67%)      | 8/21 (38%)     | 11/53 (21%)      | 0.006   |
| - CR/CRi                                           | 6/12 (50%)      | 7/21 (33%)     | 8/53 (15%)       | 0.02    |
| - MRD- CR/CRi                                      | 5/12 (42%)      | 3/21 (14%)     | 3/53 (6%)        | 0.005   |
| - Partial remission                                | 1/12 (8%)       | 2/21 (10%)     | 4/53 (8%)        | 1       |
| - Persistent disease                               | 3/12 (25%)      | 11/21 (52%)    | 38/53 (71%)      | 0.008   |
| <b>Overall survival</b> in months (Median, 95% CI) | 15.02 (8.09,NR) | 8.25 (3.45,NR) | 5.62 (3.88,7.17) | 0.1*    |

\* comparing median OS of favorable/intermediate ELN risk with adverse ELN risk: 15.02 months (95% CI: 6.87-NR) vs. 5.62 (3.88,7.17), p=0.034

**Supplemental Table 7: Multivariable analysis of clinical and genetic predictors of OS including for DNMT3A mutation status, prior HMA treatment, age and all-SCT after venetoclax therapy**

| Characteristics                      | HR   | 95% CI     | P-value    |
|--------------------------------------|------|------------|------------|
| <i>DNMT3A</i>                        | 1.13 | 0.4-3.16   | 0.82174885 |
| Prior HMA                            | 1.42 | 0.59-3.44  | 0.43033688 |
| Age                                  | 1.21 | 0.72-2.03  | 0.47171481 |
| allo-SCT after venetoclax therapy    | 0.25 | 0.05-1.14  | 0.07312844 |
| allo-SCT prior to venetoclax therapy | 1.2  | 0.44-3.27  | 0.71529671 |
| Number of prior lines of therapy >=3 | 3.29 | 0.64-16.82 | 0.15215497 |
| Aza/ ven (vs. LDAC/ven)              | 0.37 | 0.15-0.89  | 0.02552188 |
| Dec/ven (vs. LDAC/ven)               | 0.39 | 0.14-1.1   | 0.07451515 |
| Adverse cytogenetics                 | 1.85 | 0.74-4.65  | 0.19117232 |
| <i>NRAS / KRAS</i>                   | 4.67 | 1.52-14.38 | 0.00718829 |
| <i>TP53</i>                          | 2.54 | 0.8-8      | 0.11269257 |
| <i>SF3B1</i>                         | 3.14 | 0.89-11.06 | 0.07519218 |
| <i>EZH2</i>                          | 2.69 | 0.81-8.98  | 0.10704014 |
| <i>STAG2</i>                         | 0.42 | 0.08-2.12  | 0.29422045 |
| <i>IDH1/2 / NPM1</i>                 | 0.69 | 0.27-1.75  | 0.43358707 |

**Supplemental Table 8: Cytogenetic Changes at Relapse**

| ID    | Molecular Data Timepoint | Date of Marrow for Molecular Data | Karyotype                                                                                                                   | Change in Cytogenetics              |
|-------|--------------------------|-----------------------------------|-----------------------------------------------------------------------------------------------------------------------------|-------------------------------------|
| RR-1  | Diagnosis                | 2/7/17                            | 46,XY[20]                                                                                                                   |                                     |
| RR-1  | Relapse                  | 10/2/17                           | no CG submitted on 10/2/2017; 8/6/2018: +21[19/20]; 3/29/17: normal CG                                                      | Unknown                             |
| RR-2  | Diagnosis                | 2/27/17                           | CG not performed. DX 9/6/2016, inv(3q)[30] FISH Pos 46%, normal MLL                                                         |                                     |
| RR-2  | Relapse                  | 1/23/20                           | no samples submitted on 1/23/2020; however, 12/17/2019: 46,XY,inv(3)(q21q26.2)[14]/46,XY[6]; also 12/5/2019 inv(3q) by FISH | suggestive of persistent inv(3)     |
| RR-5  | Diagnosis                | 10/26/17                          | 46,XY[20] DX 7/6/2016, normal K/F                                                                                           |                                     |
| RR-5  | Relapse                  | 11/8/18                           | 46,XY,add(11)(p15)[9]/46,XY[12]                                                                                             | add(11p15)                          |
| RR-9  | Diagnosis                | 1/11/17                           | 46,XY[20]                                                                                                                   |                                     |
| RR-9  | Relapse                  | 1/15/18                           | not performed                                                                                                               | Unknown                             |
| RR-10 | Diagnosis                | 11/12/18                          | 46,XX[20]                                                                                                                   |                                     |
| RR-10 | Relapse                  | 12/31/19                          | 46,XX,+1,der(1;12)(q10;10)[3]/46,XY[4]                                                                                      | +1,der(1;12)(q10;10)                |
| RR-11 | Diagnosis                | 11/29/18                          | no CG done; DX OH 9/10/2018, t(1;6)(q31;q15)[20]                                                                            |                                     |
| RR-11 | Relapse                  | 7/29/19                           | 46,XY,t(1;6)(q32;q21)[7]/46,XY[13]                                                                                          | No change                           |
| RR-15 | Diagnosis                | 1/2/19                            | 46,XY,del(20)(q12q13.3)[9]/46,XY[11]                                                                                        |                                     |
| RR-15 | Relapse                  | 11/1/19                           | 46,XY,i(17)(q10),del(20)(q11.2q13.3)[20]                                                                                    | i(17)(q10)                          |
| RR-19 | Diagnosis                | 4/4/19                            | 46,XX,del(7)(q22q32)[8]/46,XX,t(4;12)(q12;p11.2)[4]/46,XX[8]                                                                |                                     |
| RR-19 | Relapse                  | 1/16/20                           | 46,XX,t(4;12)(q12;p11.2)[15]/46,idem,add(8)(q24)[2]/46,XY[3]                                                                | +8, normalization of del(7)         |
| RR-26 | Diagnosis                | 1/11/19                           | 46,XX,t(3;17)(p25;q12)[8]/46,XX[9]/46,XY[3]                                                                                 |                                     |
| RR-26 | Relapse                  | 7/8/19                            | 46,XX,t(3;17)(p25;q12),add(4)(q35)[13]/46,XX[7]                                                                             | add(4q35)                           |
| RR-45 | Diagnosis                | 7/26/19                           | failed cytogenetics. DX OH, 2/17/2016, 46,XX,+1,der(1;21)(q10;q10)[15]/46,XX[5]                                             |                                     |
| RR-45 | Relapse                  | 1/13/20                           | 51,XX,+der(1;21)(q10;q10),+4,+6,add(6)(q22),del(6)(q23q27),+9,+22[7]/46,XY[13]                                              | suggestive of increasing complexity |



**Supplemental Figure 1: Overall Survival based on 2017 ELN molecular risk**

**A:** KM survival blots stratified by ELN 2017 molecular risk favorable vs. intermediate vs. adverse

**B:** KM survival blots stratified by ELN 2017 molecular risk favorable/intermediate vs. adverse

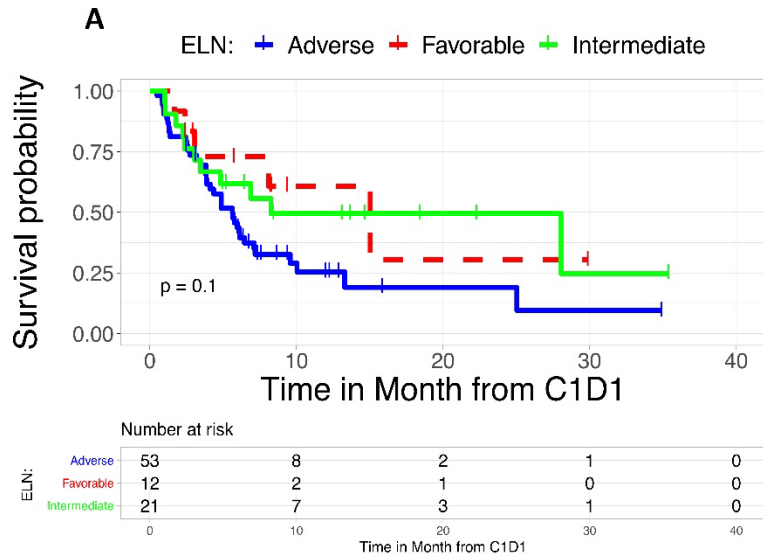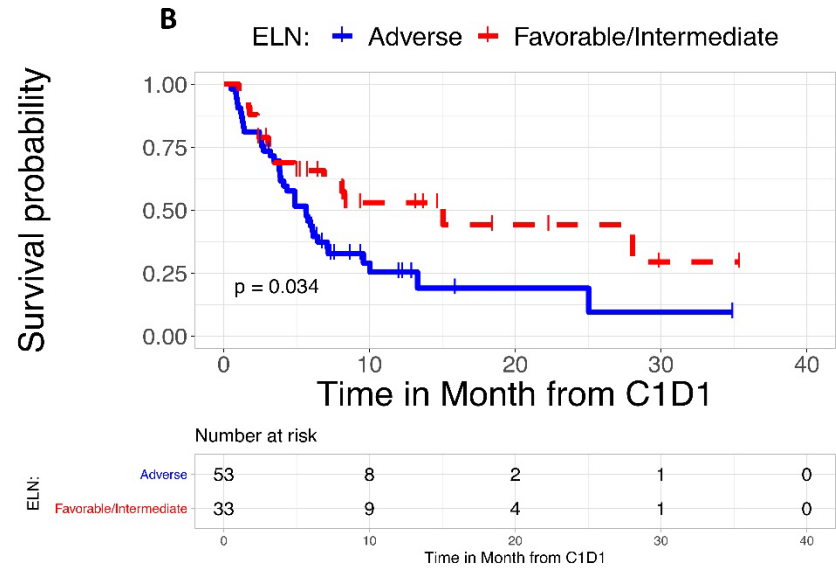

**Supplemental Figure 2: Molecular changes with variant allele frequency (VAF) at time of relapse**

These panels show the alterations in clonal architecture from the time of therapy initiation to relapse on a per-patient basis. The dashed line represents  $y = x$  and signifies the point at which any mutation would have an equal VAF in both the initial (cycle 1, day 1 = C1D1) and relapsed sample. Mutations towards the x-axis had a higher VAF prior to starting therapy, and mutations towards the y-axis had a higher VAF at the time of relapse. Mutations that fall along each axis were seen exclusively at that timepoint.

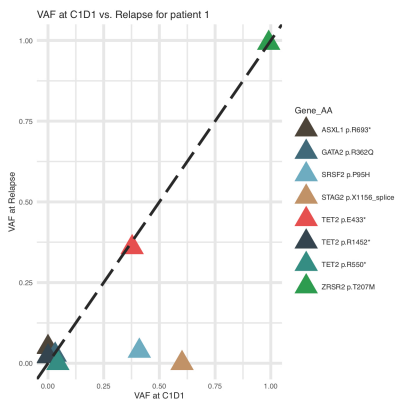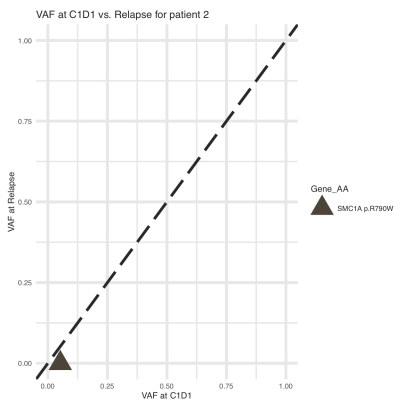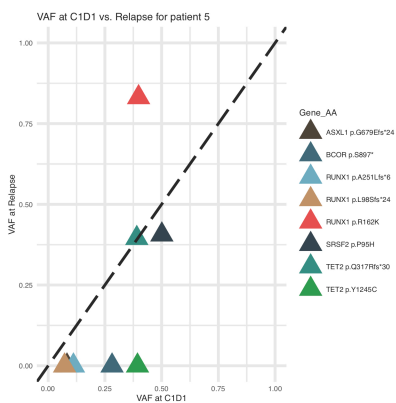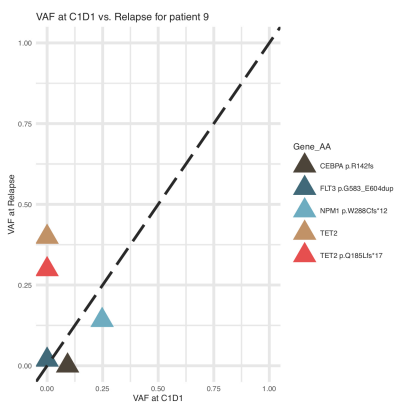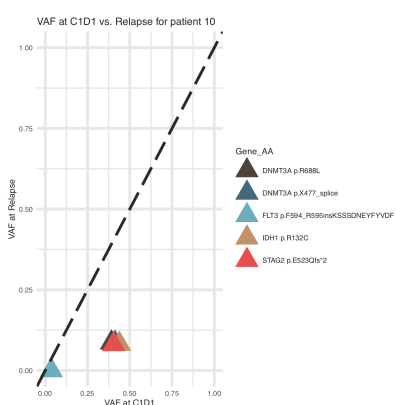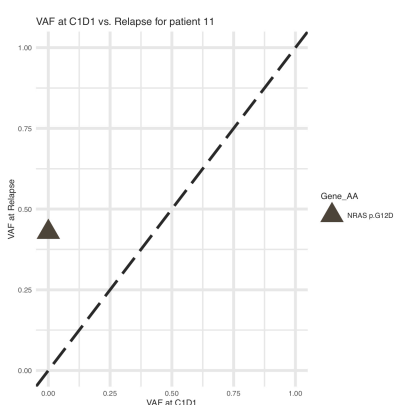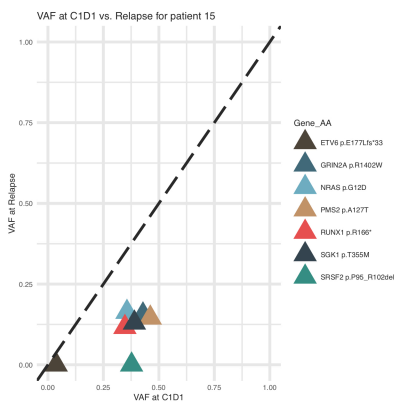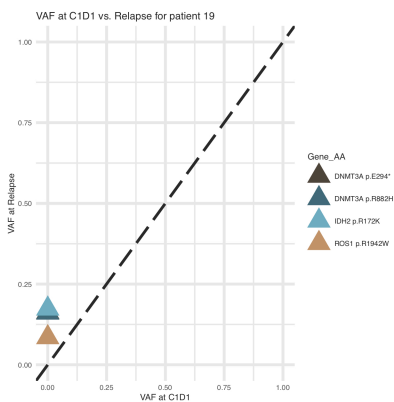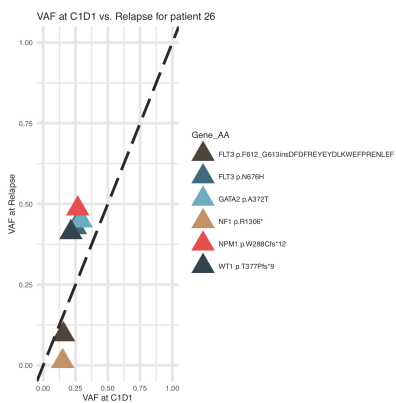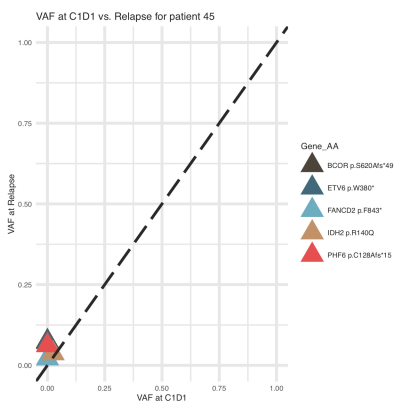

Supplement: advancesADV2020003734-suppl1.pdf [file advancesADV2020003734-suppl1.pdf]
